# 1 A Modular Approach to Active Focus 2 Stabilization for Fluorescence Microscopy

3 BIRTHE VAN DEN BERG,<sup>1</sup> ROBIN VAN DEN EYNDE,<sup>2</sup> BAPTISTE  
4 AMOUROUX,<sup>2,4</sup> MARCEL MÜLLER,<sup>3</sup> PETER DEDECKER<sup>2</sup> AND WIM  
5 VANDENBERG<sup>2,\*</sup>

6 <sup>1</sup>*Department of Computer Science, KU Leuven, Belgium*

7 <sup>2</sup>*Department of Chemistry, KU Leuven, Belgium*

8 <sup>3</sup>*Faculty of Physics, Bielefeld University, Germany*

9 <sup>4</sup>*University Paris-Saclay, France*

10 \*[wim.vandenberg@kuleuven.be](mailto:wim.vandenberg@kuleuven.be)

11 **Abstract:** Fluorescent time-lapse experiments often suffer from focus drift, regularly rendering  
12 long measurements partially unusable. Frequently, this instability can be traced back to the  
13 specific mechanical components of the setup, but even in highly robust implementations z-drift  
14 occurs due to small temperature fluctuations which are hard to avoid. To resolve this issue,  
15 microscope manufacturers often offer their own interpretation of out-of-focus correction modules  
16 for their flagship instruments. However, self-assembled or older systems typically have to fend  
17 for their own or adapt their measurements to circumvent drift effects. In this manuscript, we  
18 propose a cost-efficient z-drift detection- and correction system that, due to its modular design,  
19 can be attached to any fluorescence microscope with an actuated stage or objective, be it in a  
20 custom or commercial setup. The reason for this wide applicability is specific to the design,  
21 which has a straightforward alignment procedure and allows sharing optics with the fluorescent  
22 emission path. Our system employs an infrared (IR) laser that is passed through a double-hole  
23 mask to achieve two parallel beams which are made to reflect on the coverslip and subsequently  
24 detected on an industrial sCMOS camera. The relative position of these beams is then uniquely  
25 linked to the z-position of a microscope-mounted sample. The system was benchmarked by  
26 introducing temperature perturbations, where it was shown to achieve a stable focus, and by  
27 scanning different positions while simulating a perturbation in the z-position of the stage, where  
28 we show that a lost focus can be recovered within seconds.

29 © 2023 Optica Publishing Group under the terms of the [Optica Publishing Group Publishing Agreement](#)

## 30 1. Introduction

31 Keeping a sample in focus remains a challenging, yet essential, task in optical microscopy.  
32 Typically, this is most problematic in high-resolution imaging experiments where there is a limited  
33 depth of focus and a minimal discrepancy in the z-position can effectively render the collected data  
34 unusable. However, even low-resolution imaging can be impacted when time-lapse experiments  
35 are performed over longer time periods. Focus drift arises from a range of sources of which the  
36 most common ones are vibrations (e.g., fans), mechanical instabilities (e.g., loose gear), and  
37 thermal fluctuations (e.g., room temperature, laser heating up the sample). Although microscope  
38 designs have become increasingly more stable, and good practices have been developed, focus  
39 drift remains a practical, omnipresent and notable issue. Various techniques and systems have  
40 been proposed to detect and correct focus drift. While image-based detection methods [1, 2] rely  
41 on complex software that analyzes images and compares them with in-focus images captured  
42 beforehand, sensor-based detection methods have generally been more popular, using additional  
43 sensing circuits to detect drift and compensate for it using a control loop [3, 4].

44 Microscope manufacturers often build a z-drift compensation module into their instruments,  
45 such as Olympus' TruFocus system [5], Leica's Adaptive Focus Control (AFC) [6] and Nikon's

46 Perfect Focus System (PFS) [7]. These systems are rapidly becoming standard equipment on new  
47 motorized microscopes. However, as they are specific to the underlying microscope system, these  
48 commercial solutions may be more challenging to add to existing systems. For example, older  
49 systems, microscopes bought with a limited budget, and self-assembled systems that are often  
50 used in research environments are by default not equipped with an automated focus detection- and  
51 correction system. Several attempts have been made to control focus drift in those state-of-the-art  
52 microscope systems. However, most of these solutions suffer from ailments such as high cost,  
53 complex construction, lack of precision, slow detection and correction, and specificity to a  
54 particular context or technique [8–10].

55 In this manuscript, we present an automated focus detection- and correction system that is  
56 cost-efficient, easy to build and modular by design. Our setup is an optical z-drift detection-  
57 and correction system that uses an infrared light source split by a double-hole mask into two  
58 parallel beams. These beams are reflected on the interface between cover glass and sample,  
59 and captured by an industrial sCMOS camera. Software reads the data from the detector and  
60 computes the compensation necessary to maintain the focus position. The combination of the  
61 camera with the double-hole mask offers a smart approach for mitigating imperfections in the  
62 captured reflections [11], being less sensitive to flaws than quadrant detectors [9, 12] or line  
63 sensors [7].

64 Our automated z-drift detection- and correction system is implemented on a popular commercial  
65 microscope body (Olympus IX-71). However, due to its modularity and cost-effectiveness, it  
66 also opens up opportunities to mount it on other popular and conventional microscope systems.  
67 In particular, the system is optimized for microscopes in which the optical infrared path and the  
68 fluorescence path are shared, maximally eliminating reflections and noise. We show that our  
69 method works well through experiments with beads and a varying temperature, and on COS-7  
70 cells with manual z-dispositioning.

## 71 2. Conceptual System Description

72 The idea of this work is to use a detection technique similar to that of Binh et al. [11] to  
73 automatically find the focus position for our microscope. This focus detection method uses  
74 a collimated infrared laser to determine the sample position. In front of the laser, we put a  
75 double-hole mask, which divides the collimated laser light into two parallel beams. These beams  
76 are sent through the microscope body onto the sample, which is carried by a glass coverslip. It  
77 is exactly this glass-sample interface that reflects the laser beams. The reflected beams are captured  
78 by an industrial sCMOS camera.

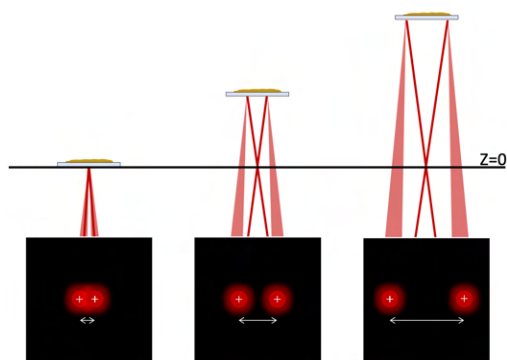

Fig. 1. Correlation between z-position of sample and camera view.

79 Figure 1 shows the possible ways for the laser beams to be reflected. The sCMOS camera detects

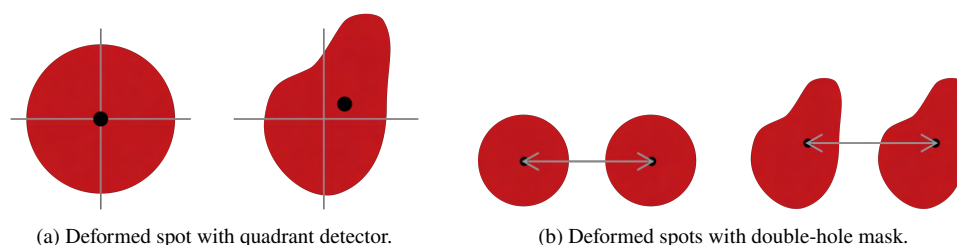

Fig. 2. The influence of deformed spots on the focus for different detectors.

80 two reflected laser spots. The horizontal distance between the detected spots is proportional to  
81 the z-position of the cover glass. The bigger the distance between the two detected spots, the  
82 further away is the sample from the zero of the z-position. Before starting an experiment, the  
83 user can define the perfect focus position of the sample on the microscope. The distance between  
84 the spots on that position determines the focusing distance. Control software then continuously  
85 adjusts the z-position to retain or regain focus, even when it is lost, by tuning the distance between  
86 the detected spots using a motorized stage or a mechanically actuated objective.

87 The system has several advantages over existing approaches. Firstly, whereas other systems  
88 [7, 9, 12] typically have a dedicated path for the z-tracking laser, our system is designed to  
89 share their fluorescence path with the z-tracking laser path, which involves including dedicated  
90 components to filter out spurious reflections on intermediary components (e.g., tube lens).  
91 Secondly, for the implementation given in Appendix A, the total price of the system comes to less  
92 than €2000, a fraction of the cost of a commercial system. Thirdly, as the system focuses the two  
93 beams on the glass-sample interface, it presents a relatively safe way of using infrared light as any  
94 infrared light emanating from the objective is highly dispersed at eye height. Finally, the use of a  
95 two-spot design is beneficial. In techniques that employ a single back-reflected beam, the shape  
96 of the spot is of utmost importance, as in most cases a circular spot is assumed [9, 12–15] and any  
97 distortions of this beam profile directly result in a focusing error. To overcome this delicate issue,  
98 computing the centroid or center-of-mass was proposed [16]. However, even this algorithm is  
99 still influenced by imperfections at the border of the spot (Figure 2a). With a double-spot design,  
100 deviations are avoided, as long as the disturbance influences both beams in a similar way, leaving  
101 the distance between the two spots more or less the same (Figure 2b).

### 102 3. Practical System Description

#### 103 3.1. Setup

104 Figure 3 gives a schematic overview of our automated focus detection- and correction system.  
105 The infrared light beam path is visualized in red, and the fluorescence path in blue. The detailed  
106 configuration is referenced in Appendix A.

107 **Fluorescence Path** The sample is excited using a Spectra X light engine (Lumencor) (named  
108 “laser” in Figure 3). The excitation light is reflected by a dichroic mirror (D3) and passes the  
109 objective, illuminating the sample. The fluorescence path (blue) then initiates at the sample  
110 and travels through the objective and the dichroic mirror (D3), reflecting on the mirror M5 and  
111 passing the tube lens (TL) of the microscope body. In this setup, this part of the optical layout is  
112 implemented using a commercial olympus IX71 inverted fluorescence microscope, where in the  
113 scheme, the black dashed line indicates enclosure in the commercial microscope body. Beyond  
114 this commercial body, the fluorescence light travels further through a lens (L6), a dichroic filter  
115 (D1), an emission filter (ND3) and is finally focussed on a Hamamatsu ORCA-Flash4.0 LT+  
116 Digital sCMOS camera using a lens (L7).

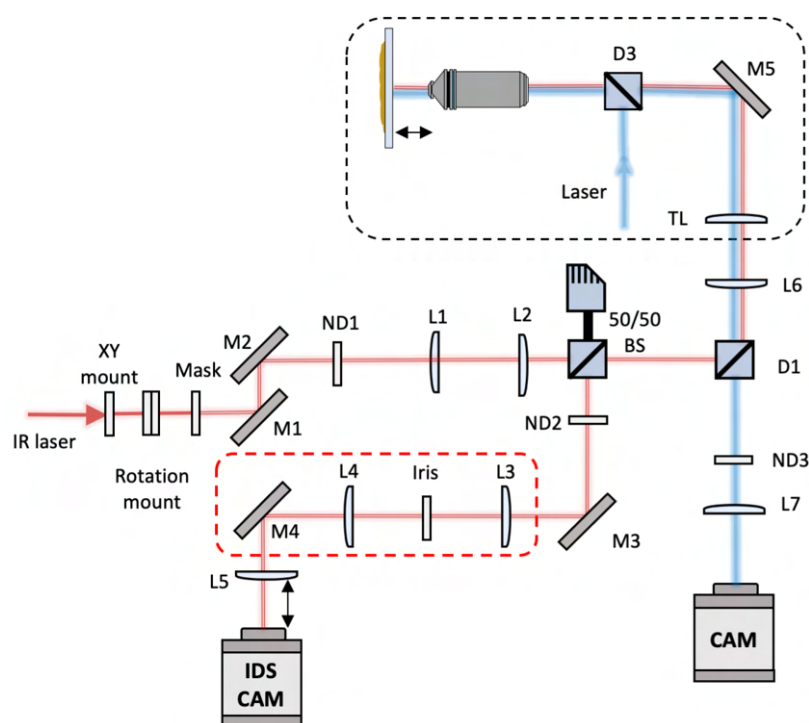

Fig. 3. Schematic overview of the system. The blue line represents the fluorescence path, and the red line the path of the two parallel infrared beams. The beams are initiated at the IR laser (left).

117 **Infrared Beam Path** The infrared beam path starts from the infrared laser (the leftmost  
118 component in Figure 3). This laser is a 3.0 mW, 830 nm infrared laser, chosen to avoid overlap  
119 with the color channels used for fluorescence detection. This laser is mounted in a pitch/yaw  
120 adapter which, with addition of an XY-mount and a rotation mount, allows for full freedom in  
121 aligning the laser beam on a double-hole mask containing drilled holes that are 600  $\mu\text{m}$  apart and  
122 500  $\mu\text{m}$  wide (Figure 4 shows the mask and its dimensions).

123 Next, two mirrors M1 and M2 guide the two beams toward the objective-sample interface while  
124 a neutral density filter (ND1) reduces their power to less than 1 mW (safety category 2). Lenses  
125 L1 and L2 are set up as a 2F relay. A 50/50 beam splitter (BS) passes half the light coming from  
126 the laser into the direction of the microscope, while the reflected half is disposed in a beam dump.  
127 At this point, the tracking laser is reflected by D1 (separating the fluorescence and tracking path).  
128 After passing L6, the tube lens, and the objective, the two beams are reflected on the glass-sample  
129 interface and retrace their path up to the 50/50 beam splitter. There, the reflected light passes a  
130 laser-line clean-up filter (ND2) to remove any (fluorescent) background signal. Next, the light  
131 passes a spurious reflection filter (the red dashed frame in Figure 3). This extension filters out  
132 extra reflections that might disturb or overwhelm the spots to be measured. These reflections  
133 may originate from different sources, such as imperfections in optical components (beam splitter,  
134 dichroics), but in our case mostly consist of infrared light reflected from lenses shared with the  
135 fluorescence path. In this additional filter, mirror M3 is used to position the beams on the spatial  
136 filter (iris) to maximally filter out light noise, and lenses L3 and L4 are set up as a 2F relay.  
137 Finally, lens L5 focuses the two parallel infrared laser beams on the IDS camera sensor. The  
138 distance between this lens and the sensor chip of the IDS camera influences the shape of the spots  
139 and the distance between them. Figure 5 shows what the reflected laser beams look like when

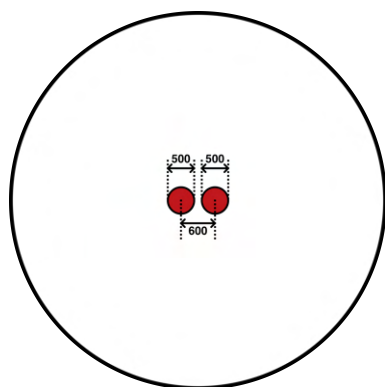

Fig. 4. Cross-section of the double-hole mask with technical dimensions ( $\mu\text{m}$ ).

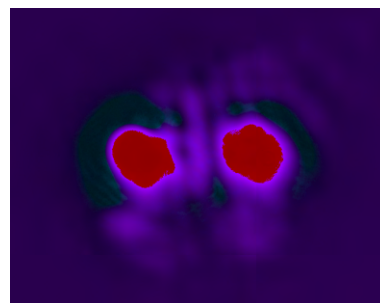

Fig. 5. IDS camera view.

140 detected by the camera.

### 141 3.2. Software

142 The system is accompanied by supporting software, that determines the spot distances and adapts  
143 the z-position of the motorized stage when focus is lost. Briefly, as the IDS camera captures  
144 images, the software computes the center of the two spots using a center-of-mass algorithm based  
145 on the pixel intensities and calculates the distance between the centers of the two spots (using  
146 Figure 6). When, during an experiment, the automatic focus system is enabled and the calculated  
147 distance between the centers of the two spots changes, the algorithm sends an instruction to the  
148 actuated stage or objective to adapt its z-position proportional to the distortion of the computed  
149 distance. The software supports any motorized stage or objective positioner compatible with  
150 Micromanager [17, 18]. Currently, IDS cameras are used for spot detection but others can be  
151 added easily. Figure 7 shows the graphical user interface (GUI) of the software.

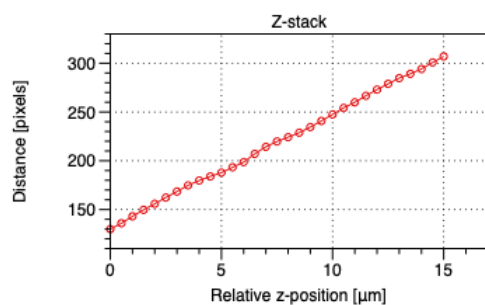

Fig. 6. Z-stack of the autofocus system.

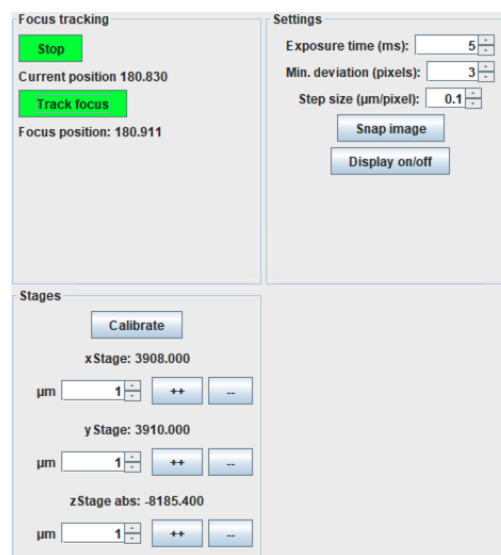

Fig. 7. Graphical User Interface (GUI).

## 152 4. Experiments and Results

### 153 4.1. Stability Against Drift

154 We have validated our z-drift correction system by visualizing the mitigation of temperature-  
155 dependent drift on a fluorescence microscope. As a sample, we have used sparsely dispersed 200  
156 nm Tetraspeck beads. We use an UPlanFI 50× objective, with a numerical aperture of 0.80.  
157 The Spectra X light source is set to 50% at a band centered around 542 nm, a Chroma ZT561RDC  
158 dichroic filter(D3) and Chroma HQ572lp emission filter(ND3) are used. The exposure time is  
159 0.1 s, and the maximal allowable deviation is set to 0.2  $\mu\text{m}$ . In order to study Z-drift we use a  
160 time-lapse experiment, imaging every second, while the temperature is varied between 32°C and  
161 45°C using the Okolab H301-T-UNIT-BL-PLUS stage top incubator. When the automated focus  
162 detection- and correction system is disabled, we clearly see the impact of the varying temperature  
163 on the z-position and the related focus of the sample: Figure 8 shows that the sample moves out  
164 of focus when the temperature is changing. The z-position and focusing distance change similarly  
165 and do not stay between the bounds (green and purple) that were set for the sample to be in focus.

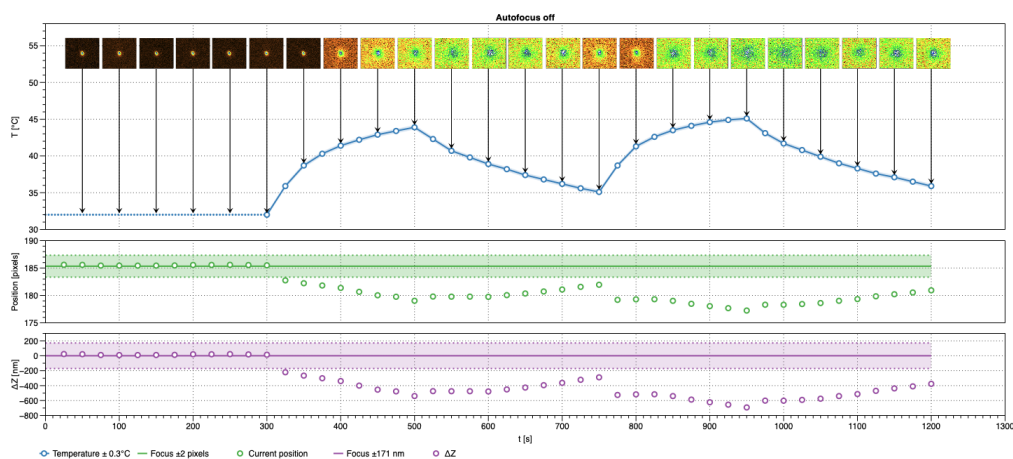

Fig. 8. Time-lapse experiment with autofocus deactivated.

166 When we repeat the same experiment with the focus detection- and correction system enabled,  
167 Figure 9 shows that the images remain in focus. The focusing distance and z-position also stay  
168 between the predefined desired bounds. Similar results were achieved with a UPlanSApo 10×  
169 objective with a numerical aperture of 0.40 and a working distance of 3.1 mm (data not shown).

### 170 4.2. Stability Against Focus Perturbations

171 To study the stability of our system on focus perturbations, we image COS-7 cells expressing  
172 a fluorescent protein (detailed in Appendix B). We use an UPlanFI 50× objective, with a  
173 numerical aperture of 0.80. During fluorescent imaging, the Spectra X light source is set to 10%  
174 at a band centered around 438 nm and a Chroma ZT561RDC dichroic filter (D3) and Chroma  
175 HQ572LP emission filter (ND1) are used. During focus tracking, the Chroma T455LP dichroic  
176 filter (D3) is used instead. The exposure time is set to 5s, and the maximal allowable deviation to  
177 0.25  $\mu\text{m}$ . Next, we loop over four distinct positions (Figure 11) and at each position we perturb  
178 the z-focus by a known amount. Then, we give the automatic focus detection- and correction  
179 system 20s to re-find focus. After these 20s, we change the dichroic filter (D3) and acquire  
180 an image of the cells. For each of the positions, we defined the ideal focusing distance before  
181 starting the experiment.



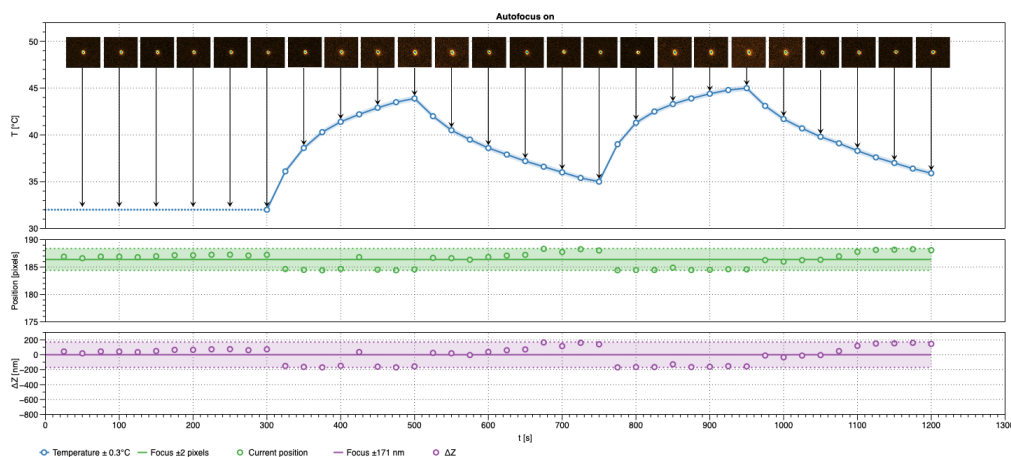

Fig. 9. Time-lapse experiment with autofocus activated.

182 The results for one position are summarized in Figure 10 and Figure 12. The top row of  
183 Figure 10 shows the acquired images for different amounts of defocus with the focus detection-  
184 and correction system disabled. In the lower row, the automatic focus detection- and correction  
185 system is enabled and the sample nicely stays in focus, even when moving a 500  $\mu\text{m}$  away from  
186 the desired focusing position.

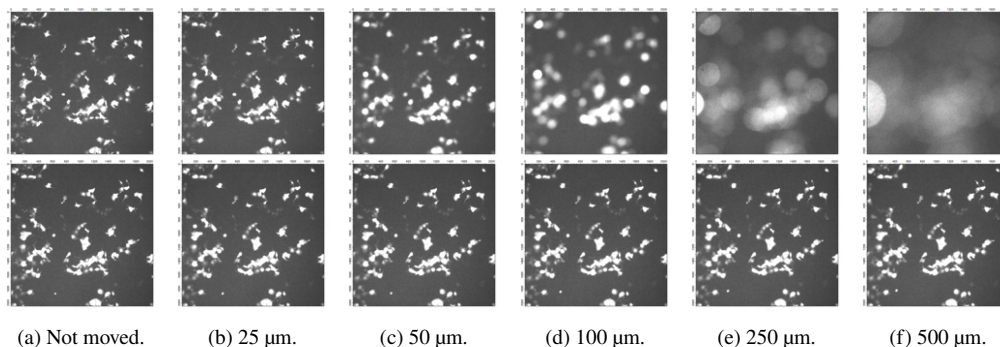

Fig. 10. Acquired images for the experiment with *cos7* cells for a single position. The first row shows the images when the automatic focusing system is off; in the second row it is on. In the respective images, we have moved down the z-position of the sample with the indicated amount.

187 Figure 12 shows the distance measured between the detected spots from the infrared beams as  
188 a function of time after a perturbation in units of camera pixels (one camera pixel corresponds to  
189 0.85  $\mu\text{m}$  in the sample). The red dotted horizontal bars show the desired range for the distance  
190 between the spots for which the sample is considered to be in focus. The desired focusing distance  
191 is 244.0 pixels with a minimal deviation of 0.5 pixels. The blue line shows the movement of the  
192 spots when adapting to the desired focusing distance. The first local minimum in the curve is  
193 caused by the delay of the stage moving to the desired position. The second local minimum in  
194 the curve occurs when we perturb the z-focus (here by 50  $\mu\text{m}$ ) and give the autofocus system  
195 time to adapt. It finds back its desired focus within about 5 seconds.

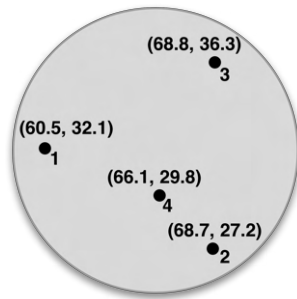

Fig. 11. Four positions on the coverslip for imaging the COS-7 cells.

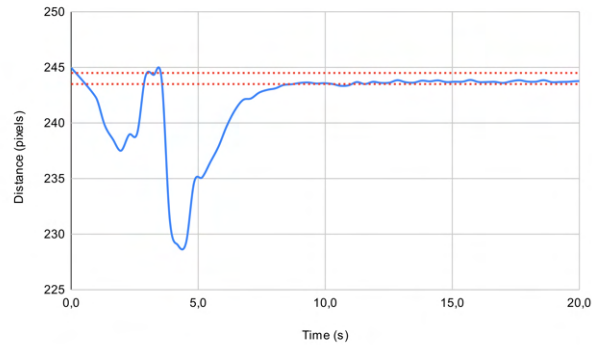

Fig. 12. Focusing distance in function of time for position 1 (move 50  $\mu\text{m}$ ).

## 196 5. Conclusion

197 We have described and built an automated out-of-focus detection- and correction system that is  
198 compatible with any microscope that has an actuated stage or objective. This automatic focusing  
199 system keeps a sample in focus during time-lapse experiments where z-drift occurs. The proposed  
200 system is cost-effective and robust, using a back-reflected infrared beam to detect the z-position  
201 of the stage or objective. The system is modular and can be easily extended with additional  
202 hardware components or added to a different microscope. In this case it is implemented as an  
203 aftermarket non-invasive add-on for a microscope where it shares the conventional detection  
204 path.

## 205 Acknowledgements

206 Robin Van den Eynde thanks the FWO for a doctoral fellowship.

## 207 References

- 208 1. S. Yazdanfar, K. B. Kenny, K. Tasimi, A. D. Corwin, E. L. Dixon, and R. J. Filkins, "Simple and robust image-based  
209 autofocusing for digital microscopy," *Opt. Express* **16**, 8670–8677 (2008).
- 210 2. S. Li, X. Cui, and W. Huang, "High resolution autofocus for spatial temporal biomedical research," *The Rev. scientific  
211 instruments* **84**, 114302 (2013).
- 212 3. Y. Liron, Y. Paran, N. Zatorsky, B. Geiger, and Z. Kam, "Laser autofocus system for high-resolution cell biological  
213 imaging," *J. microscopy* **221**, 145–51 (2006).
- 214 4. A. Pertsinidis, Y. Zhang, and S. Chu, "Subnanometre single-molecule localization, registration and distance  
215 measurements," *Nature* **466**, 647–51 (2010).
- 216 5. "TruFocus z drift compensator," [https://www.olympus-lifescience.com/en/microscopes/  
217 inverted/ix83/trufocus/#!cms\[focus\]=cmsContent6373](https://www.olympus-lifescience.com/en/microscopes/inverted/ix83/trufocus/#!cms[focus]=cmsContent6373). Accessed: 2021-12-15.
- 218 6. "Leica adaptive focus control (afc)," [http://major2020.syis.com.tw/webfiles/  
219 40a7c99d-a81e-4617-9fd4-87531a9b59c8.pdf](http://major2020.syis.com.tw/webfiles/40a7c99d-a81e-4617-9fd4-87531a9b59c8.pdf). Accessed: 2021-12-15.
- 220 7. "The nikon perfect focus system (pfs)," [https://www.microscopyu.com/tutorials/  
221 the-nikon-perfect-focus-system-pfs](https://www.microscopyu.com/tutorials/the-nikon-perfect-focus-system-pfs). Accessed: 2021-12-15.
- 222 8. W. Liu, Z. Zhong, and J. Ma, "Simple way to correct the drift in surface-coupled optical tweezers using the laser  
223 reflection pattern," *Opt. Express* **29**, 18769–18780 (2021).
- 224 9. M. Bathe-Peters, P. Annibale, and M. J. Lohse, "All-optical microscope autofocus based on an electrically tunable  
225 lens and a totally internally reflected ir laser," *Opt. Express* **26**, 2359–2368 (2018).
- 226 10. J. Luo, Y. Liang, and G. Yang, "Dynamic scan detection of focal spot on nonplanar surfaces: Theoretical analysis  
227 and realization," *Opt. Eng. - OPT ENG* **50** (2011).
- 228 11. B. Cao, P. Hoang, S. Ahn, J.-O. Kim, H. Kang, and J. Noh, "In-situ real-time focus detection during laser processing  
229 using double-hole masks and advanced image sensor software," *Sensors* **17** (2017).
- 230 12. W.-Y. Hsu, C.-S. Lee, P.-J. Chen, N.-T. Chen, F.-Z. Chen, Z.-R. Yu, C.-H. Kuo, and C.-H. Hwang, "Development of  
231 the fast astigmatic auto-focus microscope system," *Meas. Sci. Technol.* **20**, 045902 (2009).



- 232 13. C.-S. Liu, P.-H. Hu, Y.-H. Wang, S.-S. Ke, Y.-C. Lin, Y.-H. Chang, and J.-B. Horng, “Novel fast laser-based  
233 auto-focusing microscope,” in *SENSORS, 2010 IEEE*, (IEEE, 2010), pp. 481–485.
- 234 14. C.-S. Liu, P.-H. Hu, and Y.-C. Lin, “Design and experimental validation of novel optics-based autofocusing  
235 microscope,” *Appl. Phys. B* **109**, 259–268 (2012).
- 236 15. C. Gu, H. Cheng, K. Wu, L.-J. Zhang, and X.-P. Guan, “A high precision laser-based autofocus method using biased  
237 image plane for microscopy,” *J. Sensors* **2018**, 8542680:1–8542680:6 (2018).
- 238 16. C.-S. Liu, K.-W. Lin, and S.-H. Jiang, “Development of precise autofocusing microscope based on reduction of  
239 geometrical fluctuations,” in *2012 Proceedings of SICE Annual Conference (SICE)*, (IEEE, 2012), pp. 967–972.
- 240 17. A. D. Edelstein, M. A. Tsuchida, N. Amodaj, H. Pinkard, R. D. Vale, and N. Stuurman, “Advanced methods of  
241 microscope control using  $\mu$ manager software.” *J. biological methods* **1 2** (2014).
- 242 18. A. D. Edelstein, N. Amodaj, K. Hoover, R. D. Vale, and N. Stuurman, “Computer control of microscopes using  
243  $\mu$ manager,” *Curr. Protoc. Mol. Biol.* **92** (2010).
- 244 19. J. Fischer, D. Renn, F. Quitterer, A. K. Radhakrishnan, M. Liu, A. A. Makki, A. Rajjaka, S. A. Ghoprade, M. Rueping,  
245 T. Arold, M. Groll, and J. Eppinger, “A robust and versatile host protein for the design and evaluation of artificial  
246 metal centers,” *ACS Catal.* **9**, 11371–11380 (2019).
